1 A library of promoter-*gfp* fusion reporters for studying systemic  
2 expression pattern of cyclic-di-GMP metabolism-related genes in  
3 *Pseudomonas aeruginosa*

4

5 Dejian Liu<sup>1,2</sup>, Di Wang<sup>1</sup>, Qing Wei<sup>1</sup>, Yu Zhang<sup>1</sup>, Luyan Z Ma<sup>1,2\*</sup>

6

7 <sup>1</sup>State Key Laboratory of Microbial Resources, Institute of Microbiology, Chinese  
8 Academy of Sciences, Beijing 100101, China

9 <sup>2</sup>University of Chinese Academy of Sciences, Beijing 100049, China

10

11 \*Correspondence author: Luyan Z. Ma, [luyanma27@im.ac.cn](mailto:luyanma27@im.ac.cn)

12

13

14

15

16

17

18

19

20

21

22

23

24 **Abstract**

25       The opportunistic pathogen *Pseudomonas aeruginosa* is an environmental  
26 microorganism, which is notorious for its resistance or tolerance to antibiotics due to  
27 the formation of biofilms. Cyclic diguanosine monophosphate (c-di-GMP) is a  
28 bacterial second messenger that plays critical roles in biofilm formation. *P.*  
29 *aeruginosa* contains 41 genes that encode enzymes to participate in the metabolism of  
30 c-di-GMP (biosynthesis or degradation), yet it lacks tools to investigate the systemic  
31 expression pattern of those genes. Here, we constructed a promoter-*gfp* transcriptional  
32 fusion reporters' library that consists of 41 reporter plasmids. Each plasmid contains a  
33 promoter of corresponding c-di-GMP metabolism-related (CMR) genes from *P.*  
34 *aeruginosa* PAO1 strain, thus each promoter-Gfp fusion reporter can be used to detect  
35 the promoter' activity as well as the transcription of corresponding gene. The  
36 promoters' activity was tested in *P. aeruginosa* and *Escherichia coli*  
37 respectively. Among the 41 genes, the promoter of 26 genes showed activity in both *P.*  
38 *aeruginosa* and *E. coli*. The library was applied to determine the influence of different  
39 temperatures, growth media, and sub-inhibitory concentrations of antibiotics on  
40 transcriptional profile of the 41 CMR genes in *P. aeruginosa*. The results showed  
41 different growth conditions did impact different genes' transcription, while the  
42 promoter' activity of a few genes kept at the same level under several different growth  
43 conditions. In summary, we provided a promoter-*gfp* fusion reporters' library for

44 systemic monitoring or study of the regulation of CMR genes in *P. aeruginosa* and  
45 the functional promoters can also be used as a bio-brick for synthetic biology studies.

46

#### 47 **Importance**

48 The opportunistic pathogen *P. aeruginosa* can cause acute and chronic infections  
49 in humans and it is one of main pathogens in nosocomial infections. Biofilm  
50 formation is one of most important causes for *P. aeruginosa* to persist in hosts and  
51 evade immune and antibiotic attacks. c-di-GMP is an important second messenger to  
52 control biofilm formation. In *P. aeruginosa*, there are 41 genes that are predicted to  
53 participate in the making and breaking this dinucleotide. A major missing information  
54 in this field is the systemic expression profile of those genes in response to changing  
55 environment. Toward this goal, we constructed a promoter-*gfp* transcriptional fusion  
56 reporters' library that consists of 41 reporter plasmids, each of which contains a  
57 promoter of corresponding c-di-GMP metabolism-related genes in *P. aeruginosa*.  
58 This library provides a helpful tool to understand the complex regulation network  
59 related to c-di-GMP and to discover potential therapeutic targets.

60

61 **Keywords:** *Pseudomonas aeruginosa*; biofilm; c-di-GMP; promoter-*gfp* fusion  
62 library, phosphodiesterase, diguanylate cyclases, transcriptional profile

63

64

## 65 **Introduction**

66 Biofilms are termed as communities of microorganisms embedded in  
67 extracellular polymeric substances (EPS) (1). Biofilms can form on biotic and abiotic  
68 surfaces and exist as non-surface-attached aggregates(2-4), which protect  
69 microorganisms from harsh conditions and are a key feature of chronic and persistent  
70 infections(5). The second messenger *bis*-(3'-5')-cyclic guanosine monophosphate  
71 (c-di-GMP) plays an important role in biofilm formation (6, 7). In general, a high  
72 level of c-di-GMP stimulates the biosynthesis of adhesins and exopolysaccharides to  
73 promote biofilm formation, whereas low level of c-di-GMP is associated with an  
74 increase in motility and virulence (8, 9). C-di-GMP is synthesized from two GTP  
75 molecules by diguanylate cyclases (DGC) that usually harbor a conserved GGDEF  
76 domain and is hydrolyzed by c-di-GMP specific phosphodiesterases (PDE) with  
77 conserved EAL or HD-GYP domains, which degrade c-di-GMP to pGpG(8). In some  
78 bacteria, such as *Pseudomonas aeruginosa*, there are multiple genes that were  
79 predicted to have a conserved GGDEF domain and/or EAL or HD-GYP domains(10).  
80 It remains largely unclear about the systemic expression pattern of those genes due to  
81 lack of available tools.

82 *P. aeruginosa* is a Gram-negative gamma-proteobacterium that can grow in  
83 diverse habitats and acts as an opportunistic pathogen over a wide range of hosts  
84 including human, animals and plants(11). The success of *P. aeruginosa* infections

85 relies on both the production of acute virulence factors and the ability to form  
86 biofilms (12). This opportunistic pathogen has become a model bacterium for biofilm  
87 research. There are 41 genes in *P. aeruginosa*, whose encoding proteins were  
88 predicted to be involved in the synthesis and degradation of c-di-GMP, including 17  
89 different proteins with a GGDEF domain, 8 with a EAL or HD-GYP domain, and 16  
90 with both types of domains (10). Except for PA0290, PA0338, PA1851, PA2072,  
91 PA2572, PA3258, PA4396 and PA5442, the other 33 genes were functional  
92 characterized to encode a DGC or PDE(13-44). The enzymes with both GGDEF and  
93 EAL domains, are usually have only one catalytic activity, either PDE or DGC  
94 activity. However, enzymes encoded by PA0861 (*rbdA*), PA1727 (*mucR*) or PA4601  
95 (*morA*) were found to conditionally switch between the two activities (35, 45-48).  
96 Intracellular c-di-GMP level in *P. aeruginosa* relies on the expression of those 41  
97 c-di-GMP metabolisms-related (CMR) genes. However, it remains a mystery about  
98 how *P. aeruginosa* controls the expression of those c-di-GMP metabolism enzymes.

99 *P. aeruginosa* is a ubiquitous microorganism, which is able to survive in a  
100 variety of environments. Its' optimum growth temperature is 37°C. Growth occurs at  
101 temperatures as high as 42°C, but not at 4°C (49, 50). It has been reported that  
102 temperatures regulate biofilm formation of *P. aeruginosa* and the  
103 temperature-dependent changes in biofilm formation might be mediated by c-di-GMP  
104 (51). Henrik Almlad et al. have discovered a temperature-regulated DGC that  
105 coordinates temperature-dependent biofilm formation, motility, and virulence factor

106 expression in *P. aeruginosa* CF39S, a strain isolated from the sputum of patients with  
107 chronic pulmonary cystic fibrosis (CF) (52, 53). Many environmental factors (such as  
108 oxygen levels, nitric oxide, iron, and nutrients etc.) and small chemical compounds,  
109 have been reported to trigger biofilm dispersion(35, 54-56). Studies have shown that  
110 sub-inhibitory concentrations of antibiotics can induce biofilm formation of *P.*  
111 *aeruginosa* (40, 57, 58). A systemic tool will be a great help for a deep understanding  
112 about how *P. aeruginosa* regulates the 41 CMR genes in response to various  
113 environmental temperatures, signals and antibiotics. A few reports have focused on  
114 the comprehensive and systemic features of those c-di-GMP related genes or proteins  
115 in bacteria (15, 17, 59-62), while those studies are mainly focused on the functions of  
116 genes or enzymes. Therefore, a systemic transcriptional profile of the 41 CMR genes  
117 in *P. aeruginosa* remains lacking.

118 In this study, we provide a promoter-*gfp* transcriptional fusion reporters' library  
119 of the 41 genes that related to c-di-GMP metabolisms in *P. aeruginosa* for systemic  
120 transcriptional profile analysis. The plasmid pProbe-AT' was selected as the vector to  
121 construct promoter-*gfp* transcriptional fusions because owing to its a broad-host range,  
122 high stability without antibiotic selection, and low background levels of expression in  
123 multiple taxa (63). More importantly, this promotor-probe vector is able to detect  
124 weak or moderate promoters. We have tested this CMR genes' promoter-*gfp*  
125 transcriptional fusion reporters' library in *P. aeruginosa* by different temperatures,  
126 growth media, and antibiotics. Each condition did exhibit a distinctive expression

127 profile of CMR genes. Meanwhile, our results also revealed that some genes'  
128 expression can be enhanced by a certain condition, which would provide the novel  
129 targets for the investigation and therapeutic on *P. aeruginosa* in the future.

130

## 131 **Material and methods**

### 132 **Bacterial strains and growth conditions**

133 *P. aeruginosa* strain PAO1 was cultured in Luria-Bertani (LB) medium (64), or  
134 Jensen's medium(65), or M63 medium (66), or Artificial Sputum Medium (ASM) (67).  
135 *Escherichia coli* DH5 $\alpha$  (Tsingke Biotechnology Co., Beijing, China) was inoculated  
136 in LB medium at 37°C, 200 rpm. The chemical composition of all media used in this  
137 study is shown in Table S1. When necessary, antibiotics were added at the following  
138 final concentrations: 300  $\mu\text{g}/\text{mL}$  carbenicillin for *P. aeruginosa*; 100  $\mu\text{g}/\text{mL}$   
139 ampicillin for *E. coli*. The sub-inhibitory concentrations of antibiotics was applied as  
140 30  $\mu\text{g}/\text{mL}$  of erythromycin (68), or 2  $\mu\text{g}/\text{mL}$  of azithromycin (69), or 0.3  $\mu\text{g}/\text{mL}$  of  
141 tobramycin (40), or 0.0625  $\mu\text{g}/\text{mL}$  of ciprofloxacin (70).

### 142 **Construction of promoter-*gfp* transcriptional fusion reporter plasmid**

143 The plasmids constructed in this study are shown in Figure 1. The pProbe-AT'  
144 (Ap<sup>r</sup>) was used as a vector for promoter-Gfp transcriptional fusions (63). The websites  
145 (<http://www.phisite.org/> and <https://services.healthtech.dtu.dk/> and  
146 [https://www.fruitfly.org/seq\\_tools/promoter.html](https://www.fruitfly.org/seq_tools/promoter.html)) were used to predict the promoter  
147 region and RBS (ribosome binding site) region of target genes (71-73). The

148 information of cloned promoter regions and their corresponding genes and PA# was  
149 also listed in Figure 1. The cloned promoter sequences consist of the entire intergenic  
150 region, together with 0-500 bp upstream genes and 0-138 bp of the coding region of  
151 corresponding ORFs (open reading frames). All promoters were amplified from the  
152 genome DNA of *P. aeruginosa* PAO1 and then cloned into the *EcoRI*-*Bam*HI sites of  
153 pProbe-AT'. The cloned regions in each corresponding plasmid were all confirmed by  
154 sequencing. The promoter-Gfp fusion plasmid was introduced into the *P. aeruginosa*  
155 strain by chemical transformation in order to determine the promoter's activity in *P.*  
156 *aeruginosa*.

#### 157 **Isolation of total RNA and qRT-PCR**

158 PAO1 was cultivated in Jensen's medium at 37°C, 200 rpm until the OD<sub>600</sub>  
159 reached 3.0, at which point 1 mL of cells were harvested and RNA samples were  
160 extracted using the RNAPrep Pure Bacteria Kit (Tiangen Co., Beijing, China). Total  
161 cDNA was generated from 500 ng of total template RNA using the HiScript III  
162 All-in-one RT SuperMix Perfect for qPCR (Vazyme Co., Nanjing, China). The  
163 ChamQ Universal SYBR qPCR Master Mix (Vazyme Co., Nanjing, China) and  
164 gene-specific primers were used to perform quantitative reverse transcription-PCR  
165 (qRT-PCR) on 5 ng/μL cDNA in a Real-Time PCR System (Applied Biosystems  
166 ViiA 7, USA). Table S2 lists the primers used in qRT-PCR. Real-time PCR data were  
167 analyzed, validated, and calculated according to the instructions of the manufacturer.  
168 All samples were normalized to constitutively produced *rpsL* transcripts.



169 **Measurement of fluorescence intensity**

170 To determine the fluorescence intensity of the promoter, The overnight cultures  
171 of the plasmid-carrying strains grown in Jensen's medium with carbenicillin or  
172 ampicillin, were inoculated at 1% into 200  $\mu$ L of Jensen's medium (unless otherwise  
173 specified) containing carbenicillin or ampicillin in 96-well plates (NEST Co., Wuxi,  
174 China) and grow with shaking at 700 rpm in a constant temperature microplate shaker  
175 (MIULAB Co., Hangzhou, China) at 37°C (unless other specific temperature was  
176 required) until the time for measurement ( 8 hours for exponential phase culture for 24  
177 hours for stationary phase culture). Fluorescence of GFP was measured on a Synergy  
178 H4 hybrid reader (BioTek, USA) at excitation wavelength at 488 nm and emission  
179 wavelength of 520 nm with gain 50. Biomass was determined at 600 nm with gain 20  
180 as scattered light (14). Fluorescence signal value was normalized to OD<sub>600</sub>, and  
181 fluorescence derived from pPROBE-AT' was subtracted to account for background  
182 fluorescence. All experiments were performed with a minimum of three biological  
183 triplicates. Statistically significant differences were determined using a two-tailed  
184 Student's t-test ( $P < 0.05$ ).

185

186 **Results**

187 **Construction of a promoter-Gfp transcriptional fusion reporters' library for**  
188 **monitoring transcriptional profile of 41 CMR genes in *P. aeruginosa***

189 The promoter regions of 41 genes that are (or are predicted to be) involved in  
190 c-di-GMP metabolism in *P. aeruginosa* PAO1 were cloned into the vector  
191 pPROBE-AT' respectively, resulting in a library of promoter-Gfp transcriptional  
192 fusion reporter plasmids (Figure 1), which can monitor the expression of the  
193 corresponding genes in *P. aeruginosa*.

194 To evaluate whether the cloned promoter regions were functional, each  
195 promoter-Gfp fusion plasmid was transformed into PAO1, respectively. Their  
196 fluorescence intensity was measured in Jensen's medium at 37°C. The fluorescence  
197 intensity of these reporters was varied from hundreds to over 10 thousand, indicating  
198 that all promoters can initiate the transcription of *gfp*. Among the 41 genes, the  
199 promoter of PA2818 (*arr*) showed the highest fluorescence intensity (Figure 2A).  
200 PA2818 encodes a PDE named Arr, which is responsible for aminoglycoside  
201 antibiotics-induced biofilm formation (40). Moreover, fluorescence intensity of the  
202 other five genes, namely PA4843 (*gcbA*), PA4781, PA0861 (*rbdA*), PA2072, and  
203 PA3311 (*nbdA*), is also above 10,000. Among these five genes, PA4843 encodes a  
204 DGC GcbA (25), PA4781 and PA3311 (*nbdA*) both encode functional PDE, PA0861  
205 (*rbdA*) has intrinsic GTP-stimulated PDE activity as well as DGC activity (38, 45),  
206 while the function of PA2072 encoding enzyme has not determined so far (25, 74).  
207 Except for PA2818 (*arr*), the fluorescence intensity of stationary phase culture is  
208 higher than that of the exponential phase culture (Figure 2A), which is consistent with  
209 the stability of Gfp. According to previous publications (15, 75), the two key DGCs,

210 SadC and SiaD showed stronger effects on intracellular c-di-GMP concentration than  
211 other DGCs of *P. aeruginosa*, yet our results indicated their transcriptional level was  
212 relatively low among DGCs (Figure 1). We then selected five genes, PA0169 (*siaD*),  
213 PA2818 (*arr*), PA4332 (*sadC*), PA4601 (*morA*), and PA4843 (*gcbA*), to detect their  
214 transcription by qRT-PCR. As shown in Figure S1, the transcriptional level of these  
215 genes is consistent with the results of promoter-Gfp, indicating that the library can be  
216 used to monitor the expression pattern of the corresponding genes. Given that  
217 pPROBE-AT' is a stable plasmid, we compared fluorescence intensity of the 41  
218 plasmids with and without the addition of antibiotics. Without antibiotics, the  
219 fluorescence intensity of reporters showed some decrease but not significant, except  
220 for that of a few genes (especially those with fluorescence intensity over 10-thousand),  
221 suggesting that the library could be used without antibiotics in growth medium  
222 (Figure 2A) or *in vivo* study.

223

224 To test whether the 41 promoters could function in *E. coli*, the fluorescence  
225 intensity of promoter-Gfp fusion plasmids in *E. coli* strains were also measured under  
226 the same culture conditions. As shown in Figure 2B, the promoters of four genes,  
227 namely PA4843 (*gcbA*), PA2818 (*arr*), PA0861 (*rbdA*), and PA3311 (*nbdA*), keep  
228 high activity in *E. coli*, while their fluorescence intensity are approximately 10-fold  
229 less than that in *P. aeruginosa*. The promoters of 15 genes (Figure 2B, marked with  
230 number) showed baseline level of fluorescence intensity, suggesting that these genes'

231 transcription might be *Pseudomonas*-specific. The other 22 genes' promoters showed  
232 lower expression level (approximately  $\geq 50$ ) (Figure 2B).

233

234 **Effects of temperature on the transcriptional profile of CMR genes in *P.***  
235 ***aeruginosa***

236 *P. aeruginosa* can live in diverse ecological niches. Therefore, we investigated  
237 whether temperature affected the transcription of genes that were involved in  
238 c-di-GMP metabolism in PAO1. The 41 strains containing corresponding plasmids  
239 were cultured at 25°C or 30°C, and their fluorescence intensity was compared to that  
240 of their corresponding culture grown at 37°C. As shown in Figure 3, PA2567  
241 exhibited a higher expression at both 25°C and 30°C, which is the only gene that has  
242 high-level of transcription at 25°C, suggesting that this gene might be important for  
243 biofilm formation at lower temperatures. Overall, the transcription levels of most  
244 genes were relatively low at 25°C or 30°C compared to that of 37°C, while there are  
245 10 genes, namely PA0338, PA3177, PA3343 (*hsbD*), PA4843 (*gcbA*), PA2818 (*arr*),  
246 PA1433 (*lapD*), PA4367 (*bifA*), PA4601 (*morA*), PA4959 (*fimX*), and PA5295 (*proE*),  
247 have similar transcriptional levels at three tested temperatures (Figure 3, marked with  
248 red number). Among these 10 genes, PA3177 and PA3343 (*hsbD*) encode DGCs (21,  
249 22), PA2818 (*arr*), PA4367 (*bifA*), PA4959 (*fimX*) and PA5295 (*proE*) encode PDEs  
250 (36, 37, 39, 40), while PA4601 (*morA*) functions as both DGC and PDE. Furthermore,  
251 MorA is conserved among diverse *Pseudomonas* species (47, 48). In addition, 7 genes

252 exhibited lower-level expression at 25°C, yet had similar expression level at 30°C  
253 when compared to the corresponding samples at 37 °C (Figure 3, marked with black  
254 number). Taken together, our results showed that lower temperature generally reduced  
255 the expression of genes involved in c-di-GMP metabolism with some exceptions, and  
256 suggesting that the gene with high level transcription at lower temperature might be  
257 important for the survival of *P. aeruginosa* in environment.

258

259 **Effects of different media on the transcriptional profile of CMR genes in *P.***  
260 ***aeruginosa*.**

261 To investigate whether nutrient affects the transcriptome of genes related to  
262 intracellular c-di-GMP metabolism, we examined 41 genes' expression in four media,  
263 minimal medium M63, chemical defined Jensen's medium, rich medium LB, and  
264 artificial sputum media (ASM), respectively (see Table S1 for chemical composition).  
265 The fluorescence intensity of each promoter-Gfp fusion reporter was normalized to its  
266 corresponding value in Jensen's medium grown at 37°C (Figure 4).

267 The promoter activities (or expression levels of corresponding gene)  
268 significantly decreased in M63 minimal medium compared to Jensen's medium,  
269 except for PA2818 (*arr*) and PA4396, which kept the same level in M63 as in  
270 Jensen's medium (Figure 4, marked in red). In the LB medium, most genes exhibited  
271 similar (16 out of 41 genes) expression level or reduced level (24 out of 41 genes)  
272 compared to that in Jensen's medium, while PA0169 (*siaD*), as an important DGC,

273 showed a significantly increased expression (Figure 4, indicated with a red star).  
274 However, in ASM, PA2818 (*arr*) and PA4396 showed increased expression (Figure 4,  
275 marked by a red star), 12 out of 41 genes (PA2870, PA3343, PA4332, PA5487,  
276 PA2200, PA3947, PA0285, PA1727, PA3258, PA4959, PA5295 and PA5442) have  
277 similar expression level, and the other 27 genes' expression decreased compared to  
278 that in Jensen's medium.

279 Strikingly, the promoters of PA2818 (*arr*) and PA4396 exhibited the highest  
280 activity in the Jensen's medium (Figure 1), which remained at the same level in either  
281 M63 or LB, and even higher level in ASM. These results suggested the importance of  
282 these two genes. In addition, there are four genes, PA2870, PA3343 (*hsbD*), PA5487  
283 (*dgcH*) and PA5442 (marked with blue color), whose promoter activities were only  
284 reduced in M63 and kept the same level in the other three media. PA5487 (*dgcH*) was  
285 reported to be a conserved DGC that its expression is highly invariable, which is  
286 consistent with our results (14).

287

### 288 **Effects of sub-inhibitory concentrations of antibiotics on the expression pattern** 289 **of CMR genes.**

290 Previous reports showed that sub-inhibitory concentrations of aminoglycoside  
291 antibiotics induced the biofilm formation of *P. aeruginosa* (40). We then examined  
292 the effect on our reporter' library by three types of antibiotics at sub-inhibitory  
293 concentrations, including aminoglycoside antibiotics tobramycin, fluoroquinolone

294 antibiotics ciprofloxacin, macrolide antibiotics erythromycin and azithromycin,  
295 respectively. Our results showed that tobramycin increased the expression of PA2818  
296 (*arr*) (Figure 5A), which is consistent with the previous report about the contribution  
297 of PA2818 on the tobramycin-induced biofilm formation (40). The expression of two  
298 genes, PA5295 (*proE*) and PA5442 are also induced under sub-inhibitory  
299 concentrations of tobramycin (Figure 5A). ProE is a very active PDE with high  
300 enzymatic activity in the degradation of c-di-GMP and plays an important role in  
301 regulating EPS production in *P. aeruginosa* PAO1 (39), and the function of PA5442  
302 is not determined. The transcription of 7 genes (PA1107, PA4332, PA4396, PA4781,  
303 PA4601, PA4959, PA5017) were not changed by tobramycin. The other 28 genes'  
304 expression were significantly reduced in the presence of tobramycin.

305       Among the four antibiotics, ciprofloxacin induces the expression of a large  
306 number of genes, as shown in Figure 5B, 18 genes' expression was significantly  
307 elevated, while 8 genes' expression was decreased, and 15 genes' expression showed  
308 no changes. It is worth noting that expression of PA2818 (*arr*), PA5295 (*proE*), and  
309 PA5442, were enhanced by both tobramycin and ciprofloxacin.

310       For erythromycin and azithromycin, they both repressed transcription of most  
311 c-di-GMP metabolism genes, only a few genes' expression is enhanced (Figure 5C).  
312 PA0285 (*pipA*) is the only gene whose transcription is enhanced by both erythromycin  
313 and azithromycin. The transcription of PA1727 (*mucR*) is enhanced by azithromycin,  
314 but reduced by erythromycin.

315

## 316 **Discussion**

317 C-di-GMP is an important second messenger involved in bacterial switching  
318 from motile to sessile lifestyles. It is critical for bacteria to control the intracellular  
319 c-di-GMP level in response to changing environments. The opportunistic pathogen *P.*  
320 *aeruginosa* can live in diverse ecological niches. Consistently, it has 41 genes that are  
321 predicted to encode proteins for the synthesis or degradation of c-di-GMP. Extensive  
322 studies have been done to study their functions in respect to biofilm formation and  
323 motilities. However, it remains a mystery about when and where those genes will be  
324 transcribed and there is still a paucity of information concerning the systemic  
325 expression pattern of those genes. In this study, we have constructed a promoter-*gfp*  
326 transcriptional fusion reporters' library for systemic investigating the transcription or  
327 regulation of the 41 c-di-GMP's metabolism-related genes.

328 We have examined this c-di-GMP metabolism-related (CMR)  
329 genes' promoter-Gfp fusion library by different growth conditions, including different  
330 media, temperatures, or antibiotics. Each condition does affect different genes'  
331 transcription and some genes' transcription are induced in a typical condition. For  
332 example, the expression of PA2567 is enhanced by lower temperature  
333 (25°C>30°C>37°C). The sub-inhibitory concentrations of tobramycin induce the  
334 transcription of the three genes: PA2818 (*arr*), PA5295 (*proE*) and PA5442  
335 respectively. A previous study has showed that PA2818 (*arr*) is important for biofilm



336 formation induced by aminoglycoside antibiotics(40), whereas the functions of  
337 PA5295(*proE*) and PA5442 have not been linked with antibiotics. Our results have  
338 shown that this library is not only helpful for studying the systemic expression pattern  
339 of CMR genes, but also can reveal the new roles of those genes.

340 It is worth noting that PA2818 (*arr*) has the highest transcription among the 41  
341 CMR genes. Moreover, its transcript is consistently stable in several tested conditions  
342 and elevated when grown in artificial sputum media or in the presence of  
343 sub-inhibitory concentrations of aminoglycoside antibiotics. These results suggested  
344 that PA2818 (*arr*) might play a key role in biofilm-related persistent infections caused  
345 by *P. aeruginosa*. Given that *P. aeruginosa* can cause life-threatening lung infections  
346 in cystic fibrosis patients, our results have also provided a therapeutic target.

347 The promoter-probe vector pProbe-AT' used in this study is a broad-host range  
348 vector, thus we have examined the promoter's activity in both *P. aeruginosa* and *E.*  
349 *coli*. The promoters of 26 genes can initiate the transcription of *gfp* in *E. coli*.,  
350 suggesting these promoters might function in Gram-negative bacteria. Therefore, this  
351 promoter-*gfp* library also provide a library of bio-bricks for synthetic biology.

352 In summary, the CMR gene' promoter-*gfp* transcriptional fusion reporters'  
353 library we have constructed in this study is a versatile and helpful tool. The library  
354 can be used in the following aspects: i, investigating the systemic expression pattern  
355 and regulatory network of CMR genes in *P. aeruginosa*; ii, determining the regulatory  
356 mechanism of any factor that affects intracellular c-di-GMP in *P. aeruginosa*; iii,

357 discovering compounds or drugs that target at the intracellular c-di-GMP of *P.*  
358 *aeruginosa*; iv, elucidating the role of CMR genes and their regulated pathways; V, a  
359 promoter library for future applications in synthetic biology.

### 360 **Competing financial interests**

361 The authors declare that they have no competing financial interests.

### 362 **Acknowledgements**

363 Authors thank Dr. Xi Liu in the Institute of Microbiology, Chinese Academy of  
364 Sciences, for critical reading on manuscript, Zhenyu Zhang and Qi Zhou for help in  
365 figure making. This work is supported by the National Key R&D Program of China  
366 (2021YFA0909500, 2019YFC804104, and 2019YFA0905501), the National Natural  
367 Science Foundation of China (91951204, 32070033). The funders had no role in the  
368 study design, data collection and interpretation, or the decision to submit the work for  
369 publication.

370

### 371 **References**

- 372 1. Wei Q, Ma LZ. 2013. Biofilm matrix and its regulation in *Pseudomonas*  
373 *aeruginosa*. *Int J Mol Sci* 14:20983-1005.
- 374 2. Römling U, Kjelleberg S, Normark S, Nyman L, Uhlin BE, Åkerlund B. 2014.  
375 Microbial biofilm formation: a need to act. *Journal of Internal Medicine*  
376 276:98-110.
- 377 3. Flemming HC, Wingender J, Szewzyk U, Steinberg P, Rice SA, Kjelleberg S.  
378 2016. Biofilms: an emergent form of bacterial life. *Nat Rev Microbiol*  
379 14:563-75.
- 380 4. Sønderholm M, Kragh KN, Koren K, Jakobsen TH, Darch SE, Alhede M,  
381 Jensen P, Whiteley M, Kühl M, Bjarnsholt T. 2017. *Pseudomonas aeruginosa*  
382 Aggregate Formation in an Alginate Bead Model System Exhibits In

- 383 Vivo-Like Characteristics. *Appl Environ Microbiol* 83.
- 384 5. Lyczak JB, Cannon CL, Pier GB. 2002. Lung infections associated with cystic  
385 fibrosis. *Clin Microbiol Rev* 15:194-222.
- 386 6. Römling U, Galperin MY, Gomelsky M. 2013. Cyclic di-GMP: the first 25  
387 years of a universal bacterial second messenger. *Microbiol Mol Biol Rev*  
388 77:1-52.
- 389 7. Lee CK, Schmidt WC, Webster SS, Chen JW, O'Toole GA, Wong GCL. 2022.  
390 Broadcasting of amplitude- and frequency-modulated c-di-GMP signals  
391 facilitates cooperative surface commitment in bacterial lineages. *Proc Natl*  
392 *Acad Sci U S A* 119.
- 393 8. Hengge R. 2009. Principles of c-di-GMP signalling in bacteria. *Nat Rev*  
394 *Microbiol* 7:263-73.
- 395 9. Ha DG, O'Toole GA. 2015. c-di-GMP and its Effects on Biofilm Formation  
396 and Dispersion: a *Pseudomonas aeruginosa* Review. *Microbiol Spectr*  
397 3:Mb-0003-2014.
- 398 10. Banerjee P, Sahoo PK, Sheenu, Adhikary A, Ruhel R, Jain D. 2021. Molecular  
399 and structural facets of c-di-GMP signalling associated with biofilm formation  
400 in *Pseudomonas aeruginosa*. *Mol Aspects Med* 81:101001.
- 401 11. Neves PR, McCulloch JA, Mamizuka EM, Lincopan N. 2014.  
402 PSEUDOMONAS | *Pseudomonas aeruginosa*, p 253-260. In Batt CA,  
403 Tortorello ML (ed), *Encyclopedia of Food Microbiology (Second Edition)*  
404 doi:<https://doi.org/10.1016/B978-0-12-384730-0.00283-4>. Academic Press,  
405 Oxford.
- 406 12. Jimenez PN, Koch G, Thompson JA, Xavier KB, Cool RH, Quax WJ. 2012.  
407 The multiple signaling systems regulating virulence in *Pseudomonas*  
408 *aeruginosa*. *Microbiol Mol Biol Rev* 76:46-65.
- 409 13. Colley B, Dederer V, Carnell M, Kjelleberg S, Rice SA, Klebensberger J. 2016.  
410 SiaA/D Interconnects c-di-GMP and RsmA Signaling to Coordinate Cellular  
411 Aggregation of *Pseudomonas aeruginosa* in Response to Environmental  
412 Conditions. *Front Microbiol* 7:179.
- 413 14. Wei Q, Leclercq S, Bhasme P, Xu A, Zhu B, Zhang Y, Zhang M, Wang S, Ma  
414 LZ. 2019. Diguanylate Cyclases and Phosphodiesterases Required for  
415 Basal-Level c-di-GMP in *Pseudomonas aeruginosa* as Revealed by  
416 Systematic Phylogenetic and Transcriptomic Analyses. *Appl Environ*  
417 *Microbiol* 85.
- 418 15. Bhasme P, Wei Q, Xu A, Naqvi STA, Wang D, Ma LZ. 2020. Evaluation and  
419 characterization of the predicted diguanylate cyclase-encoding genes in  
420 *Pseudomonas aeruginosa*. *Microbiologyopen* 9:e975.
- 421 16. Zhang Y, Guo J, Zhang N, Yuan W, Lin Z, Huang W. 2019. Characterization  
422 and analysis of a novel diguanylate cyclase PA0847 from *Pseudomonas*  
423 *aeruginosa* PAO1. *Infect Drug Resist* 12:655-665.
- 424 17. Merritt JH, Ha DG, Cowles KN, Lu W, Morales DK, Rabinowitz J, Gitai Z,

- 425 O'Toole GA. 2010. Specific control of *Pseudomonas aeruginosa*  
426 surface-associated behaviors by two c-di-GMP diguanylate cyclases. mBio 1.
- 427 18. Ueda A, Wood TK. 2009. Connecting quorum sensing, c-di-GMP, pel  
428 polysaccharide, and biofilm formation in *Pseudomonas aeruginosa* through  
429 tyrosine phosphatase TpbA (PA3885). PLoS Pathog 5:e1000483.
- 430 19. Chen Y, Liu S, Liu C, Huang Y, Chi K, Su T, Zhu D, Peng J, Xia Z, He J, Xu S,  
431 Hu W, Gu L. 2016. Dcsbis (PA2771) from *Pseudomonas aeruginosa* is a  
432 highly active diguanylate cyclase with unique activity regulation. Sci Rep  
433 6:29499.
- 434 20. Kulasakara H, Lee V, Brensic A, Liberati N, Urbach J, Miyata S, Lee DG,  
435 Neely AN, Hyodo M, Hayakawa Y, Ausubel FM, Lory S. 2006. Analysis of  
436 *Pseudomonas aeruginosa* diguanylate cyclases and phosphodiesterases reveals  
437 a role for bis-(3'-5')-cyclic-GMP in virulence. Proc Natl Acad Sci U S A  
438 103:2839-44.
- 439 21. Poudyal B, Sauer K. 2018. The PA3177 Gene Encodes an Active Diguanylate  
440 Cyclase That Contributes to Biofilm Antimicrobial Tolerance but Not Biofilm  
441 Formation by *Pseudomonas aeruginosa*. Antimicrob Agents Chemother 62.
- 442 22. Valentini M, Laventie BJ, Moscoso J, Jenal U, Filloux A. 2016. The  
443 Diguanylate Cyclase HsbD Intersects with the HptB Regulatory Cascade to  
444 Control *Pseudomonas aeruginosa* Biofilm and Motility. PLoS Genet  
445 12:e1006354.
- 446 23. De N, Pirruccello M, Krasteva PV, Bae N, Raghavan RV, Sondermann H. 2008.  
447 Phosphorylation-independent regulation of the diguanylate cyclase WspR.  
448 PLoS Biol 6:e67.
- 449 24. Merritt JH, Brothers KM, Kuchma SL, O'Toole GA. 2007. SadC reciprocally  
450 influences biofilm formation and swarming motility via modulation of  
451 exopolysaccharide production and flagellar function. J Bacteriol 189:8154-64.
- 452 25. Petrova OE, Cherny KE, Sauer K. 2014. The *Pseudomonas aeruginosa*  
453 diguanylate cyclase GcbA, a homolog of *P. fluorescens* GcbA, promotes initial  
454 attachment to surfaces, but not biofilm formation, via regulation of motility. J  
455 Bacteriol 196:2827-41.
- 456 26. Basu Roy A, Sauer K. 2014. Diguanylate cyclase NicD-based signalling  
457 mechanism of nutrient-induced dispersion by *Pseudomonas aeruginosa*. Mol  
458 Microbiol 94:771-93.
- 459 27. Cai YM, Yu KW, Liu JH, Cai Z, Zhou ZH, Liu Y, Wang TF, Yang L. 2022. The  
460 c-di-GMP Phosphodiesterase PipA (PA0285) Regulates Autoaggregation and  
461 Pf4 Bacteriophage Production in *Pseudomonas aeruginosa* PAO1. Appl  
462 Environ Microbiol doi:10.1128/aem.00039-22:e0003922.
- 463 28. Okegbe C, Fields BL, Cole SJ, Beierschmitt C, Morgan CJ, Price-Whelan A,  
464 Stewart RC, Lee VT, Dietrich LEP. 2017. Electron-shuttling antibiotics  
465 structure bacterial communities by modulating cellular levels of c-di-GMP.  
466 Proc Natl Acad Sci U S A 114:E5236-e5245.

- 467 29. Bouffartigues E, Moscoso JA, Duchesne R, Rosay T, Fito-Boncompte L,  
468 Gicquel G, Maillot O, Bénard M, Bazire A, Brenner-Weiss G, Lesouhaitier O,  
469 Lerouge P, Dufour A, Orange N, Feuilloley MG, Overhage J, Filloux A,  
470 Chevalier S. 2015. The absence of the *Pseudomonas aeruginosa* OprF protein  
471 leads to increased biofilm formation through variation in c-di-GMP level.  
472 Front Microbiol 6:630.
- 473 30. Pesavento C, Becker G, Sommerfeldt N, Possling A, Tschowri N, Mehliis A,  
474 Hengge R. 2008. Inverse regulatory coordination of motility and  
475 curli-mediated adhesion in *Escherichia coli*. Genes Dev 22:2434-46.
- 476 31. Newell PD, Monds RD, O'Toole GA. 2009. LapD is a bis-(3',5')-cyclic  
477 dimeric GMP-binding protein that regulates surface attachment by  
478 *Pseudomonas fluorescens* Pf0-1. Proc Natl Acad Sci U S A 106:3461-6.
- 479 32. Cai YM, Hutchin A, Craddock J, Walsh MA, Webb JS, Tews I. 2020.  
480 Differential impact on motility and biofilm dispersal of closely related  
481 phosphodiesterases in *Pseudomonas aeruginosa*. Sci Rep 10:6232.
- 482 33. Rao F, Qi Y, Chong HS, Kotaka M, Li B, Li J, Lescar J, Tang K, Liang ZX.  
483 2009. The functional role of a conserved loop in EAL domain-based cyclic  
484 di-GMP-specific phosphodiesterase. J Bacteriol 191:4722-31.
- 485 34. Petrova OE, Schurr JR, Schurr MJ, Sauer K. 2012. Microcolony formation by  
486 the opportunistic pathogen *Pseudomonas aeruginosa* requires pyruvate and  
487 pyruvate fermentation. Mol Microbiol 86:819-35.
- 488 35. Li Y, Heine S, Entian M, Sauer K, Frankenberg-Dinkel N. 2013. NO-induced  
489 biofilm dispersion in *Pseudomonas aeruginosa* is mediated by an MHYT  
490 domain-coupled phosphodiesterase. J Bacteriol 195:3531-42.
- 491 36. Kuchma SL, Brothers KM, Merritt JH, Liberati NT, Ausubel FM, O'Toole GA.  
492 2007. BifA, a cyclic-Di-GMP phosphodiesterase, inversely regulates biofilm  
493 formation and swarming motility by *Pseudomonas aeruginosa* PA14. J  
494 Bacteriol 189:8165-78.
- 495 37. Kazmierczak BI, Lebron MB, Murray TS. 2006. Analysis of FimX, a  
496 phosphodiesterase that governs twitching motility in *Pseudomonas aeruginosa*.  
497 Mol Microbiol 60:1026-43.
- 498 38. Roy AB, Petrova OE, Sauer K. 2012. The phosphodiesterase DipA (PA5017)  
499 is essential for *Pseudomonas aeruginosa* biofilm dispersion. J Bacteriol  
500 194:2904-15.
- 501 39. Feng Q, Ahator SD, Zhou T, Liu Z, Lin Q, Liu Y, Huang J, Zhou J, Zhang LH.  
502 2020. Regulation of Exopolysaccharide Production by ProE, a Cyclic-Di-GMP  
503 Phosphodiesterase in *Pseudomonas aeruginosa* PAO1. Front Microbiol  
504 11:1226.
- 505 40. Hoffman LR, D'Argenio DA, MacCoss MJ, Zhang Z, Jones RA, Miller SI.  
506 2005. Aminoglycoside antibiotics induce bacterial biofilm formation. Nature  
507 436:1171-5.
- 508 41. Bellini D, Horrell S, Hutchin A, Phippen CW, Strange RW, Cai Y, Wagner A,

- 509 Webb JS, Tews I, Walsh MA. 2017. Dimerisation induced formation of the  
510 active site and the identification of three metal sites in  
511 EAL-phosphodiesterases. *Scientific reports* 7:42166-42166.
- 512 42. Rao F, Yang Y, Qi Y, Liang ZX. 2008. Catalytic mechanism of cyclic  
513 di-GMP-specific phosphodiesterase: a study of the EAL domain-containing  
514 RocR from *Pseudomonas aeruginosa*. *J Bacteriol* 190:3622-31.
- 515 43. Stelitano V, Giardina G, Paiardini A, Castiglione N, Cutruzzolà F, Rinaldo S.  
516 2013. C-di-GMP hydrolysis by *Pseudomonas aeruginosa* HD-GYP  
517 phosphodiesterases: analysis of the reaction mechanism and novel roles for  
518 pGpG. *PLoS One* 8:e74920.
- 519 44. Ryan RP, Lucey J, O'Donovan K, McCarthy Y, Yang L, Tolker-Nielsen T, Dow  
520 JM. 2009. HD-GYP domain proteins regulate biofilm formation and virulence  
521 in *Pseudomonas aeruginosa*. *Environ Microbiol* 11:1126-36.
- 522 45. Liu C, Liew CW, Wong YH, Tan ST, Poh WH, Manimekalai MSS, Rajan S,  
523 Xin L, Liang ZX, Grüber G, Rice SA, Lescar J. 2018. Insights into Biofilm  
524 Dispersal Regulation from the Crystal Structure of the PAS-GGDEF-EAL  
525 Region of RbdA from *Pseudomonas aeruginosa*. *J Bacteriol* 200.
- 526 46. Hay ID, Remminghorst U, Rehm BH. 2009. MucR, a novel  
527 membrane-associated regulator of alginate biosynthesis in *Pseudomonas*  
528 *aeruginosa*. *Appl Environ Microbiol* 75:1110-20.
- 529 47. Phippen CW, Mikolajek H, Schlaefli HG, Keevil CW, Webb JS, Tews I. 2014.  
530 Formation and dimerization of the phosphodiesterase active site of the  
531 *Pseudomonas aeruginosa* MorA, a bi-functional c-di-GMP regulator. *FEBS*  
532 *Lett* 588:4631-6.
- 533 48. Choy WK, Zhou L, Syn CK, Zhang LH, Swarup S. 2004. MorA defines a new  
534 class of regulators affecting flagellar development and biofilm formation in  
535 diverse *Pseudomonas* species. *J Bacteriol* 186:7221-8.
- 536 49. Wu W, Jin Y, Bai F, Jin S. 2015. Chapter 41 - *Pseudomonas aeruginosa*, p  
537 753-767. In Tang Y-W, Sussman M, Liu D, Poxton I, Schwartzman J (ed),  
538 *Molecular Medical Microbiology* (Second Edition)  
539 doi:<https://doi.org/10.1016/B978-0-12-397169-2.00041-X>. Academic Press,  
540 Boston.
- 541 50. Bennik MHJ. 1999. PSEUDOMONAS | *Pseudomonas aeruginosa*, p  
542 1867-1871. In Robinson RK (ed), *Encyclopedia of Food Microbiology*  
543 doi:<https://doi.org/10.1006/rwfm.1999.1295>. Elsevier, Oxford.
- 544 51. Kim S, Li X-H, Hwang H-J, Lee J-H. 2020. Thermoregulation of  
545 *Pseudomonas aeruginosa* Biofilm Formation. *Applied and environmental*  
546 *microbiology* 86:e01584-20.
- 547 52. Almlad H, Randall TE, Liu F, Leblanc K, Groves RA, Kittichotirat W,  
548 Winsor GL, Fournier N, Au E, Groizeleau J, Rich JD, Lou Y, Granton E,  
549 Jennings LK, Singletary LA, Winstone TML, Good NM, Bumgarner RE,  
550 Hynes MF, Singh M, Stietz MS, Brinkman FSL, Kumar A, Brassinga AKC,

- 551 Parsek MR, Tseng BS, Lewis IA, Yipp BG, MacCallum JL, Harrison JJ. 2021.  
552 Bacterial cyclic diguanylate signaling networks sense temperature. *Nature*  
553 *communications* 12:1986-1986.
- 554 53. Starkey M, Hickman JH, Ma L, Zhang N, De Long S, Hinz A, Palacios S,  
555 Manoil C, Kirisits MJ, Starner TD, Wozniak DJ, Harwood CS, Parsek MR.  
556 2009. *Pseudomonas aeruginosa* rugose small-colony variants have adaptations  
557 that likely promote persistence in the cystic fibrosis lung. *J Bacteriol*  
558 191:3492-503.
- 559 54. Nair HAS, Subramoni S, Poh WH, Hasnuddin NTB, Tay M, Givskov M,  
560 Tolker-Nielsen T, Kjelleberg S, McDougald D, Rice SA. 2021. Carbon  
561 starvation of *Pseudomonas aeruginosa* biofilms selects for dispersal  
562 insensitive mutants. *BMC Microbiol* 21:255.
- 563 55. Andersen JB, Hultqvist LD, Jansen CU, Jakobsen TH, Nilsson M, Rybtke M,  
564 Uhd J, Fritz BG, Seifert R, Berthelsen J, Nielsen TE, Qvortrup K, Givskov M,  
565 Tolker-Nielsen T. 2021. Identification of small molecules that interfere with  
566 c-di-GMP signaling and induce dispersal of *Pseudomonas aeruginosa* biofilms.  
567 *NPJ biofilms and microbiomes* 7:59-59.
- 568 56. Paiardini A, Mantoni F, Giardina G, Paone A, Janson G, Leoni L, Rampioni G,  
569 Cutruzzola F, Rinaldo S. 2018. A novel bacterial l-arginine sensor controlling  
570 c-di-GMP levels in *Pseudomonas aeruginosa*. *Proteins* 86:1088-1096.
- 571 57. Davarzani F, Yousefpour Z, Saidi N, Owlia P. 2021. Different effects of  
572 sub-minimum inhibitory concentrations of gentamicin on the expression of  
573 genes involved in alginate production and biofilm formation of *Pseudomonas*  
574 *aeruginosa*. *Iranian journal of microbiology* 13:808-816.
- 575 58. Gupta P, Chhibber S, Harjai K. 2016. Subinhibitory concentration of  
576 ciprofloxacin targets quorum sensing system of *Pseudomonas aeruginosa*  
577 causing inhibition of biofilm formation & reduction of virulence. *The Indian*  
578 *journal of medical research* 143:643-651.
- 579 59. Kulasekara H, Lee V, Brencic A, Liberati N, Urbach J, Miyata S, Lee DG,  
580 Neely AN, Hyodo M, Hayakawa Y, Ausubel FM, Lory S. 2006. Analysis of  
581 *Pseudomonas aeruginosa* diguanylate cyclases and phosphodiesterases reveals  
582 a role for bis-(3'-5')-cyclic-GMP in virulence. *Proc Natl Acad Sci USA*  
583 103:2839-44.
- 584 60. Massie JP, Reynolds EL, Koestler BJ, Cong JP, Agostoni M, Waters CM. 2012.  
585 Quantification of high-specificity cyclic diguanylate signaling. *Proc Natl Acad*  
586 *Sci U S A* 109:12746-51.
- 587 61. Ha DG, Richman ME, O'Toole GA. 2014. Deletion mutant library for  
588 investigation of functional outputs of cyclic diguanylate metabolism in  
589 *Pseudomonas aeruginosa* PA14. *Appl Environ Microbiol* 80:3384-93.
- 590 62. Liberati Nicole T, Urbach Jonathan M, Miyata S, Lee Daniel G, Drenkard E,  
591 Wu G, Villanueva J, Wei T, Ausubel Frederick M. 2006. An ordered,  
592 nonredundant library of *Pseudomonas aeruginosa* strain PA14 transposon

- 593 insertion mutants. Proceedings of the National Academy of Sciences  
594 103:2833-2838.
- 595 63. Miller WG, Leveau JH, Lindow SE. 2000. Improved gfp and inaZ  
596 broad-host-range promoter-probe vectors. Mol Plant Microbe Interact  
597 13:1243-50.
- 598 64. Bertani G. 1951. Studies on lysogenesis. I. The mode of phage liberation by  
599 lysogenic *Escherichia coli*. J Bacteriol 62:293-300.
- 600 65. Jensen SE, Fecycz IT, Campbell JN. 1980. Nutritional factors controlling  
601 exocellular protease production by *Pseudomonas aeruginosa*. J Bacteriol  
602 144:844-7.
- 603 66. Zhang Y, Guo J, Zhang N, Yuan W, Lin Z, Huang W. 2019. Characterization  
604 and analysis of a novel diguanylate cyclase PA0847 from *Pseudomonas*  
605 *aeruginosa* PAO1. Infection and drug resistance 12:655-665.
- 606 67. Neve RL, Carrillo BD, Phelan VV. 2021. Impact of Artificial Sputum Medium  
607 Formulation on *Pseudomonas aeruginosa* Secondary Metabolite Production. J  
608 Bacteriol 203:e0025021.
- 609 68. Gbian DL, Omri A. 2021. The Impact of an Efflux Pump Inhibitor on the  
610 Activity of Free and Liposomal Antibiotics against *Pseudomonas aeruginosa*.  
611 Pharmaceutics 13:577.
- 612 69. Kikuchi Y, Tateda K, Fuse ET, Matsumoto T, Gotoh N, Fukushima J, Takizawa  
613 H, Nagase T, Standiford TJ, Yamaguchi K. 2009. Hyperoxia exaggerates  
614 bacterial dissemination and lethality in *Pseudomonas aeruginosa* pneumonia.  
615 Pulmonary Pharmacology & Therapeutics 22:333-339.
- 616 70. Otoupal PB, Eller KA, Erickson KE, Campos J, Aunins TR, Chatterjee A.  
617 2021. Potentiating antibiotic efficacy via perturbation of non-essential gene  
618 expression. Commun Biol 4:1267.
- 619 71. Klucar L, Stano M, Hajduk M. 2010. phiSITE: database of gene regulation in  
620 bacteriophages. Nucleic Acids Research 38:D366-D370.
- 621 72. Knudsen S. 1999. Promoter2.0: for the recognition of PolIII promoter  
622 sequences. Bioinformatics 15:356-61.
- 623 73. Reese MG. 2001. Application of a time-delay neural network to promoter  
624 annotation in the *Drosophila melanogaster* genome. Comput Chem 26:51-6.
- 625 74. Gaspar MC, Couet W, Olivier JC, Pais AA, Sousa JJ. 2013. *Pseudomonas*  
626 *aeruginosa* infection in cystic fibrosis lung disease and new perspectives of  
627 treatment: a review. Eur J Clin Microbiol Infect Dis 32:1231-52.
- 628 75. Zhu B, Liu C, Liu S, Cong H, Chen Y, Gu L, Ma LZ. 2016. Membrane  
629 association of SadC enhances its diguanylate cyclase activity to control  
630 exopolysaccharides synthesis and biofilm formation in *Pseudomonas*  
631 *aeruginosa*. Environ Microbiol 18:3440-3452.
- 632  
633



634

635 Figure legends

636

637 Fig 1. The information of 41 plasmids in the library of c-di-GMP metabolism-related  
638 (CMR) genes' promoter-Gfp transcriptional fusion reporters and corresponding genes.  
639 +1, the first base of the start codon ; ND, not determined; F.I., fluorescence intensity;  
640 PA#, corresponding locus number in genome of *P. aeruginosa* PAO1 ; \*, the function  
641 is not fully identified; FIG, Fluorescence intensity of GFP. Shown is the average  
642 fluorescence intensity value per OD<sub>600</sub> of the corresponding sample grown in Jensen's  
643 medium at 37°C for 24 hours.

644

645 Fig 2. The fluorescence intensity of CMR' gene promoter-Gfp fusion reporter library  
646 in *P. aeruginosa* or *E. coli* and detecting the transcription of selected genes by  
647 qRT-PCR. FIG, Fluorescence intensity of GFP. A, the fluorescence intensity CMR'  
648 promoter-Gfp fusion reporter in *P. aeruginosa* cultures at exponential phase with  
649 carbenicillin, stationary phase with carbenicillin, and stationary phase without  
650 carbenicillin were examined and the fluorescence intensities was normalized by  
651 corresponding OD<sub>600</sub>. B, the fluorescence intensity of CMR' promoter-Gfp fusion  
652 reporters in *E. coli*. the fluorescence intensity of CMR' promoter-Gfp fusion reporters  
653 of *E. coli* stationary phase cultures. FIG, Fluorescence intensity of GFP. The  
654 fluorescence intensities were normalized by corresponding OD<sub>600</sub>.

655 Shown were the fluorescence intensities of stationary phase cultures normalized by  
656 corresponding OD<sub>600</sub>.

657

658 Fig 3. Effects of different temperatures on the promoter activity of each CMR gene in  
659 *P. aeruginosa* PAO1. Blue column, 25°C; orange column, 30°C. The value was  
660 normalized to the fluorescence intensity per OD<sub>600</sub> of the corresponding strain grown  
661 in Jensen's medium at 37°C; Red numbers indicated the genes that their promoter  
662 activity did not change at these three temperatures; Black numbers marked the genes  
663 that their promoter activity at 30°C were similar as that at 37°C; Small asterisk,  
664 significantly decreased; Large asterisk, significantly increased. \*,  $P < 0.05$ . Error bars  
665 were calculated from three independent experiments.

666

667

668 Fig 4. Effects of different growth media on the promoter activity or expression of  
669 CMR' genes in *P. aeruginosa* PAO1 background. The value was normalized to the  
670 fluorescence intensity per OD<sub>600</sub> of the corresponding strain grown in Jensen's  
671 medium at 37°C. Black asterisks represent significantly reduced; Red asterisks  
672 represent significantly elevated. Genes highlighted in red were significantly elevated  
673 in ASM with no change in the other media; Genes highlighted in blue, significantly  
674 reduced in M63 with no change in the other media. Shown were averages with  
675 standard division calculated from three independent experiments. \*,  $P < 0.05$ .

676

677 Fig 5. Effects of sub-inhibitory concentrations of antibiotics on the promoter activity  
678 or expression of CMR' genes in *P. aeruginosa* PAO1. A-D, the results of tobramycin,  
679 ciprofloxacin, erythromycin, and azithromycin treatment, respectively. Each value  
680 was normalized to the corresponding sample without antibiotic treatment. The genes  
681 with promoter activity significantly elevated in more than 2 antibiotics were indicated  
682 with arrows; Small asterisks marked the genes with significantly reduced level and  
683 large asterisk indicated those with significantly increased level. Error bars were  
684 calculated from three independent experiments. \*,  $P < 0.05$ .

685

686 Figure S1. The relative transcriptional level of PA0169 (*siaD*), PA4332 (*sadC*),  
687 PA4601 (*morA*), PA4843 (*gcbA*), and PA2818 (*arr*) to PAO1 was quantified by  
688 qRT-PCR. The house keeping gene *rpsL* was used as an endogenous control to  
689 normalize the quantification of the mRNA target. \*\*,  $P < 0.01$ ; \*\*\*,  $P < 0.001$ .

690

691

692 Table S1. The chemical composition of media used in this study.

| <b>Medium</b>       | <b>Component</b>                                | <b>Mass to add(g/L)</b> | <b>Notes/sterilization method</b>                       |
|---------------------|-------------------------------------------------|-------------------------|---------------------------------------------------------|
| <b>LB</b>           | Tryptone                                        | 10                      | Adjust pH to 7.0,<br>sterilization at 121°C for 30 min. |
|                     | Yeast extract                                   | 5                       |                                                         |
|                     | NaCl                                            | 10                      |                                                         |
| <b>M63</b>          | KH <sub>2</sub> PO <sub>4</sub>                 | 13.608                  | Sterilization at 115°C for 30 min.                      |
|                     | KOH                                             | 4.21                    |                                                         |
|                     | (NH <sub>4</sub> ) <sub>2</sub> SO <sub>4</sub> | 1.98                    |                                                         |
|                     | MgSO <sub>4</sub> ·7H <sub>2</sub> O            | 0.25                    |                                                         |
|                     | FeSO <sub>4</sub> ·7H <sub>2</sub> O            | 0.001                   |                                                         |
|                     | Glucose·H <sub>2</sub> O                        | 3.96                    |                                                         |
| <b>Jensen's</b>     | NaCl                                            | 5                       | Adjust pH to 7.3,<br>sterilization at 115°C for 30 min. |
|                     | K <sub>2</sub> HPO <sub>4</sub>                 | 2.51                    |                                                         |
|                     | Glutamic acid                                   | 15.56                   |                                                         |
|                     | Valine                                          | 2.81                    |                                                         |
|                     | Phenylalanine                                   | 1.32                    |                                                         |
|                     | Glucose·H <sub>2</sub> O                        | 13.87                   |                                                         |
|                     | MgSO <sub>4</sub> ·7H <sub>2</sub> O            | 1.65                    |                                                         |
|                     | CaCl <sub>2</sub> ·2H <sub>2</sub> O            | 0.105                   |                                                         |
|                     | FeSO <sub>4</sub> ·7H <sub>2</sub> O            | 0.0055                  |                                                         |
|                     | ZnSO <sub>4</sub> ·7H <sub>2</sub> O            | 0.012                   |                                                         |
| <b>Artificial</b>   | L-alanine                                       | 0.1585802               | 0.2 µm filter                                           |
| <b>Sputum</b>       | L-arginine·HCl                                  | 0.04339596              | 0.2 µm filter                                           |
| <b>Medium (ASM)</b> | L-aspartic acid·Na·H <sub>2</sub> O             | 0.1433268               | prepare in 0.5 M NaOH, 0.2 µm filter                    |
|                     | L-cysteine·HCl                                  | 0.0252192               | make fresh, 0.2 µm filter                               |
|                     | L-glutamic acid·HCl                             | 0.28458                 | 0.2 µm filter                                           |
|                     | glycine·HCl                                     | 0.13428212              | 0.2 µm filter                                           |
|                     | histidine·HCl·H <sub>2</sub> O                  | 0.1090076               | make fresh, 0.2 µm filter                               |
|                     | L-isoleucine                                    | 0.1469216               | 0.2 µm filter                                           |
|                     | L-leucine                                       | 0.2111998               | 0.2 µm filter                                           |
|                     | L-lysine·HCl                                    | 0.3886792               | 0.2 µm filter                                           |
|                     | methionine                                      | 0.09459914              | 0.2 µm filter                                           |
|                     | L-phenylalanine                                 | 0.0875507               | make fresh, 0.2 µm filter                               |
|                     | proline                                         | 0.19134606              | 0.2 µm filter                                           |
|                     | serine                                          | 0.1531314               | 0.2 µm filter                                           |
|                     | L-threonine                                     | 0.12769664              | make fresh, 0.2 µm filter                               |
|                     | tryptophan                                      | 0.00265499              | prepare in 0.2 M NaOH, 0.2 µm                           |

---

|                                                      |             |                                      |
|------------------------------------------------------|-------------|--------------------------------------|
|                                                      |             | filter                               |
|                                                      | 0.1806104   | prepare in 1.0 M NaOH, 0.2 $\mu$ m   |
| L-tyrosine·2Na·H <sub>2</sub> O                      |             | filter                               |
| L-valine                                             | 0.1309737   | 0.2 $\mu$ m filter                   |
| L-ornithine·HCl                                      | 0.1129754   | 0.2 $\mu$ m filter                   |
| NaCl                                                 | 3.02795172  | 0.2 $\mu$ m filter                   |
| KCl                                                  | 1.1084094   | 0.2 $\mu$ m filter                   |
| NaH <sub>2</sub> PO <sub>4</sub>                     | 0.000179387 | 0.2 $\mu$ m filter                   |
| Na <sub>2</sub> HPO <sub>4</sub> ·12H <sub>2</sub> O | 0.000447663 | 0.2 $\mu$ m filter                   |
| KNO <sub>3</sub>                                     | 0.0321498   | 0.2 $\mu$ m filter                   |
| K <sub>2</sub> SO <sub>4</sub>                       | 0.04722446  | 0.2 $\mu$ m filter                   |
| NH <sub>4</sub> Cl                                   | 0.12198     | 0.2 $\mu$ m filter                   |
| MOPS                                                 | 2.3125      | 0.2 $\mu$ m filter                   |
| CaCl <sub>2</sub>                                    | 0.25785554  | 0.2 $\mu$ m filter                   |
| MgCl <sub>2</sub> ·6H <sub>2</sub> O                 | 0.1231998   | 0.2 $\mu$ m filter                   |
| FeSO <sub>4</sub> ·7H <sub>2</sub> O                 | 0.001000836 | make fresh, 0.2 $\mu$ m filter       |
| Dextrose                                             | 0.54048     | 0.2 $\mu$ m filter                   |
| L-Lactic Acid                                        | 0.837744    | Adjust pH to 7.0, 0.2 $\mu$ m filter |

---

693

694 Table S2. Primers used for qRT-PCR in this study.

---

| <b>Primers</b> | <b>Sequence (5'→3')</b> |
|----------------|-------------------------|
| RT-rpsL-F      | GTAAGGTATGCCGTGTACG     |
| RT-rpsL-R      | CACTACGCTGTGCTCTTG      |
| RT-PA0169-F    | GATGGACATCCTCGACCTGC    |
| RT-PA0169-R    | CGGCTCATCGTCGGCTACT     |
| RT-PA2818-F    | GCTCGTCCTGGTCTCCTTTACT  |
| RT-PA2818-R    | CCCGGAACGAATCTTACCC     |
| RT-PA4332-F    | GCGTGTTGTCCTTGGTGTTCT   |
| RT-PA4332-R    | GGATCGTCACCGTGTTTCGC    |
| RT-PA4601-F    | GCATACCCTGGAGCAGATGTT   |
| RT-PA4601-R    | CGGCTGTCGAGGCACTTT      |
| RT-PA4843-F    | GCACAAAGGCACCCACCA      |
| RT-PA4843-R    | AGAGCGTCGCTGCGAATG      |

---

695

696

| GGDEF only  |         |                 |       |                          |                | GGDEF-EAL |         |                 |       |                        |                 |
|-------------|---------|-----------------|-------|--------------------------|----------------|-----------|---------|-----------------|-------|------------------------|-----------------|
| No.         | Plasmid | Promoter region | FIG   | PA#                      | Encoded enzyme | No.       | Plasmid | Promoter region | FIG   | PA#                    | Encoded enzyme  |
| 1           | pPA0169 |                 | 661   | PA0169 ( <i>siaD</i> )   | DGC(13)        | 21        | pPA0285 |                 | 832   | PA0285 ( <i>pipA</i> ) | PDE(27)         |
| 2           | pPA0290 |                 | 3510  | PA0290                   | DGC*(14)       | 22        | pPA0575 |                 | 3821  | PA0575 ( <i>rmcA</i> ) | PDE(28)         |
| 3           | pPA0338 |                 | 4819  | PA0338                   | DGC*(15)       | 23        | pPA0861 |                 | 12297 | PA0861 ( <i>rbdA</i> ) | PDE/DGC (38,45) |
| 4           | pPA0847 |                 | 958   | PA0847                   | DGC(16)        | 24        | pPA1181 |                 | 4382  | PA1181 ( <i>yegE</i> ) | DGC(29,30)      |
| 5           | pPA1107 |                 | 9917  | PA1107 ( <i>roeA</i> )   | DGC(17)        | 25        | pPA1433 |                 | 5413  | PA1433 ( <i>lapD</i> ) | EP(31)          |
| 6           | pPA1120 |                 | 648   | PA1120 ( <i>yfiN</i> )   | DGC(18)        | 26        | pPA1727 |                 | 3932  | PA1727 ( <i>mucR</i> ) | PDE/DGC (35,46) |
| 7           | pPA1851 |                 | 3372  | PA1851                   | DGC*(15)       | 27        | pPA2072 |                 | 19773 | PA2072                 | DGC*(32)        |
| 8           | pPA2771 |                 | 11101 | PA2771 ( <i>Dcsbis</i> ) | DGC(19)        | 28        | pPA2567 |                 | 4724  | PA2567                 | PDE(33)         |
| 9           | pPA2870 |                 | 1426  | PA2870                   | DGC(20)        | 29        | pPA3258 |                 | 639   | PA3258                 | PDE*(34)        |
| 10          | pPA3177 |                 | 9409  | PA3177                   | DGC(21)        | 30        | pPA3311 |                 | 13097 | PA3311 ( <i>nbdA</i> ) | PDE(35)         |
| 11          | pPA3343 |                 | 6363  | PA3343 ( <i>hsbD</i> )   | DGC(22)        | 31        | pPA4367 |                 | 3213  | PA4367 ( <i>bifA</i> ) | PDE(36)         |
| 12          | pPA3702 |                 | 663   | PA3702 ( <i>wspR</i> )   | DGC(23)        | 32        | pPA4601 |                 | 4402  | PA4601 ( <i>morA</i> ) | PDE/DGC (47,48) |
| 13          | pPA4332 |                 | 1897  | PA4332 ( <i>sadC</i> )   | DGC(24)        | 33        | pPA4959 |                 | 3645  | PA4959 ( <i>fimX</i> ) | PDE(37)         |
| 14          | pPA4396 |                 | 3035  | PA4396                   | DGC*(15)       | 34        | pPA5017 |                 | 5711  | PA5017 ( <i>dipA</i> ) | PDE(38)         |
| 15          | pPA4843 |                 | 20597 | PA4843 ( <i>gcbA</i> )   | DGC(25)        | 34        | pPA5295 |                 | 6410  | PA5295 ( <i>proE</i> ) | PDE(39)         |
| 16          | pPA4929 |                 | 4718  | PA4929 ( <i>nicD</i> )   | DGC(26)        | 36        | pPA5442 |                 | 5356  | PA5442                 | ND              |
| 17          | pPA5487 |                 | 3748  | PA5487 ( <i>dgch</i> )   | DGC(14)        | EAL only  |         |                 |       |                        |                 |
| HD-GYP only |         |                 |       |                          |                | No.       | Plasmid | Promoter region | FIG   | PA#                    | Encoded enzyme  |
| 18          | pPA2572 |                 | 6067  | PA2572                   | PDE* (44,61)   | 37        | pPA2133 |                 | 695   | PA2133 ( <i>fcsR</i> ) | PDE(20)         |
| 19          | pPA4108 |                 | 3787  | PA4108                   | PDE (43,44)    | 38        | pPA2200 |                 | 1156  | PA2200                 | PDE(20)         |
| 20          | pPA4781 |                 | 15502 | PA4781                   | PDE (43,44)    | 39        | pPA2818 |                 | 25796 | PA2818 ( <i>arr</i> )  | PDE(40)         |
|             |         |                 |       |                          |                | 40        | pPA3825 |                 | 2568  | PA3825                 | PDE(20,41)      |
|             |         |                 |       |                          |                | 41        | pPA3947 |                 | 993   | PA3947 ( <i>rocR</i> ) | PDE(42)         |

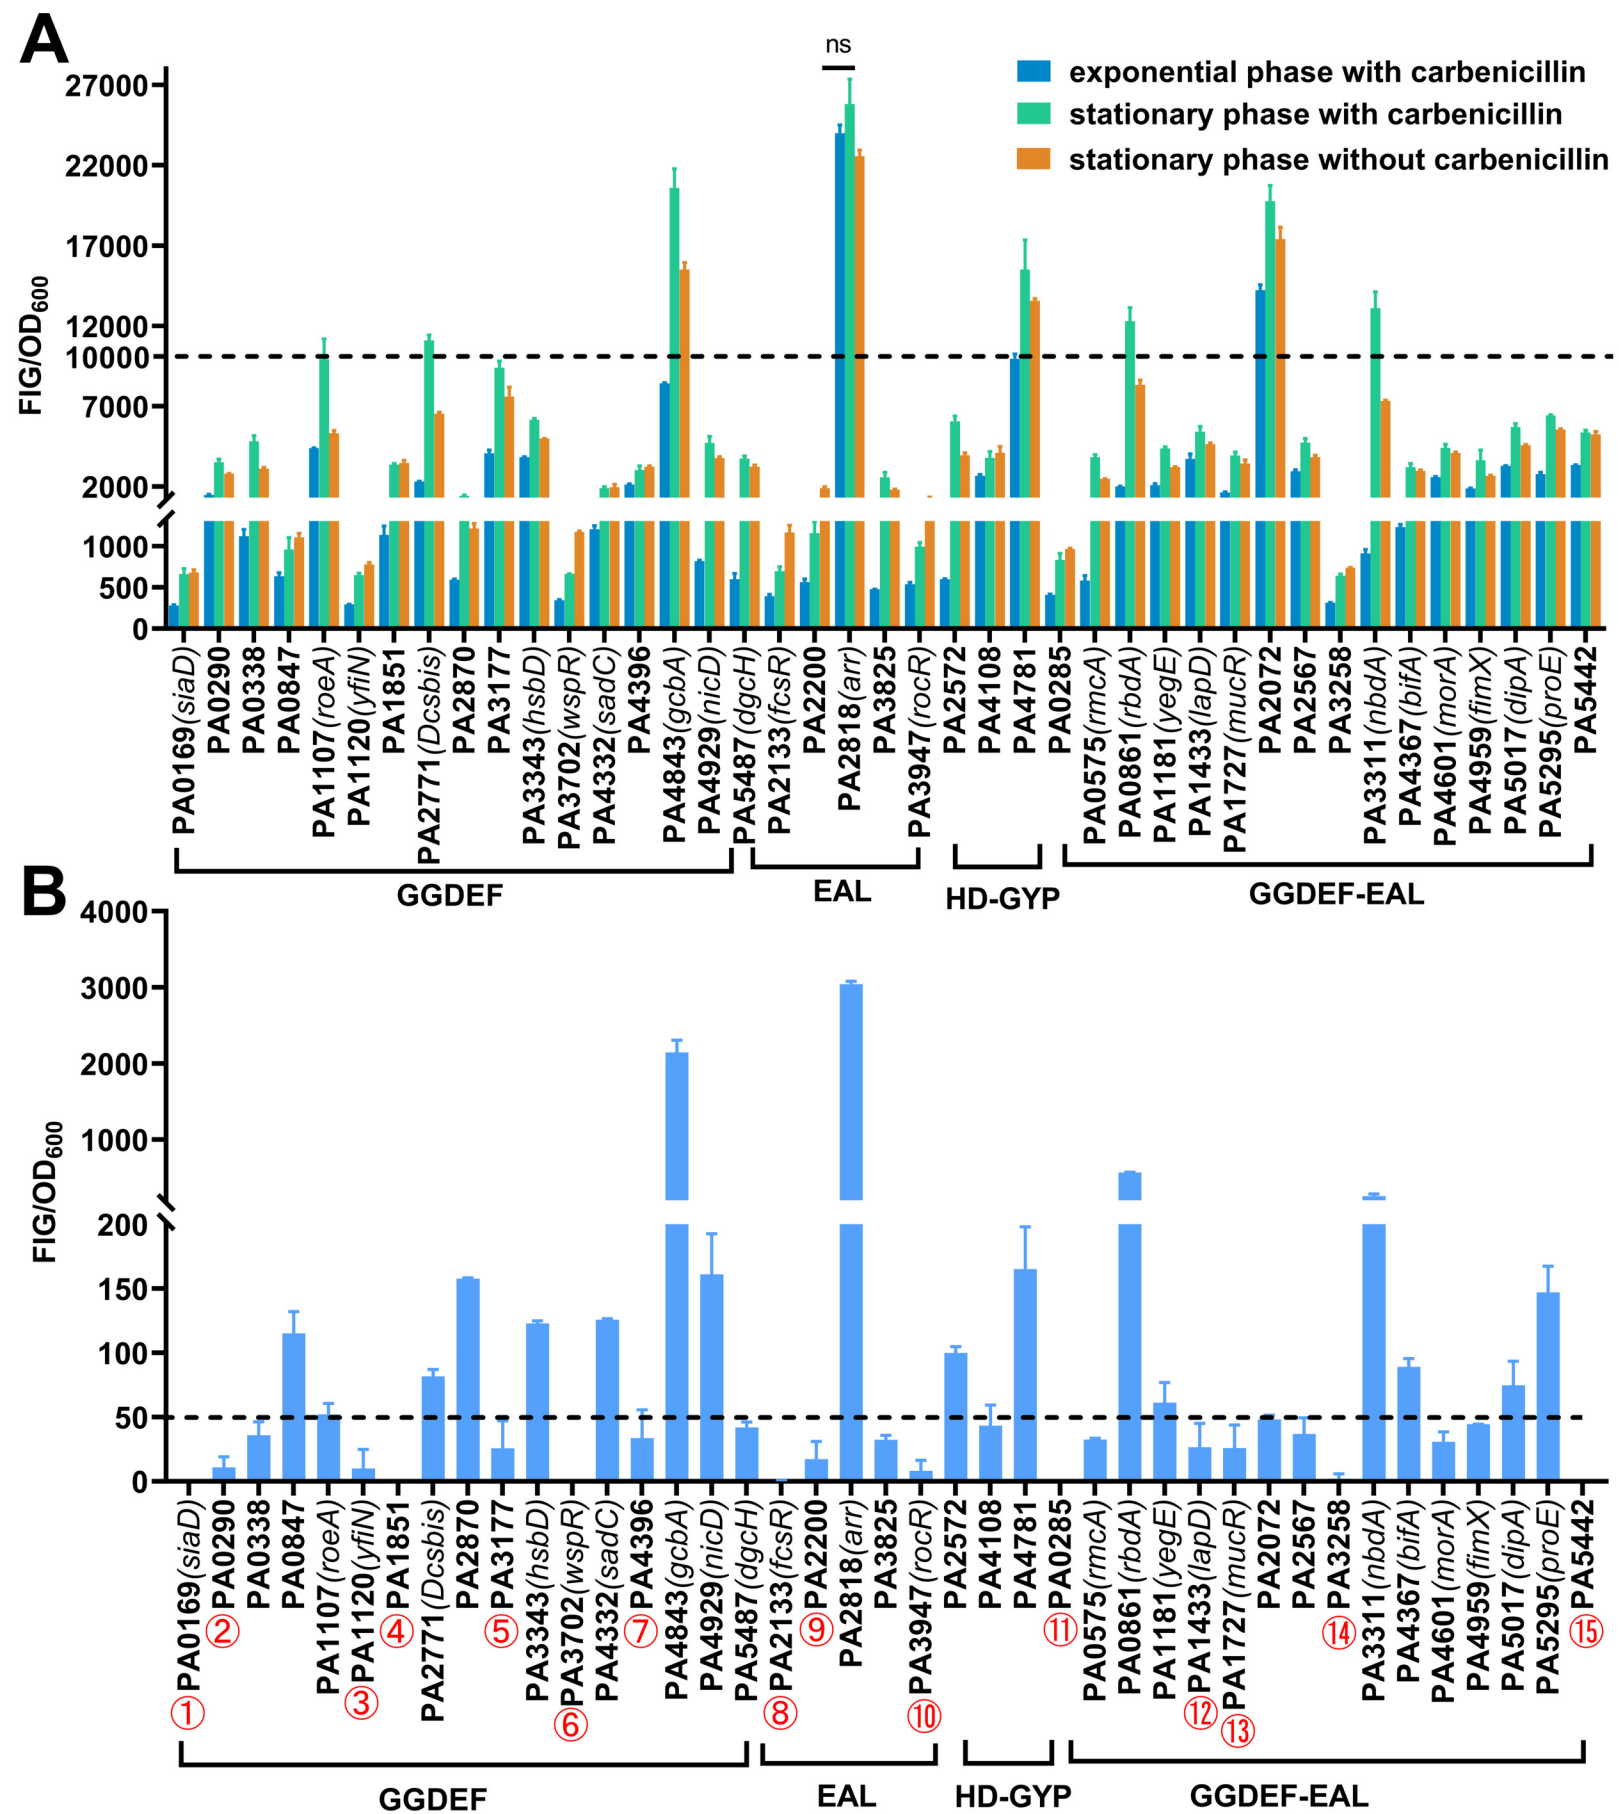

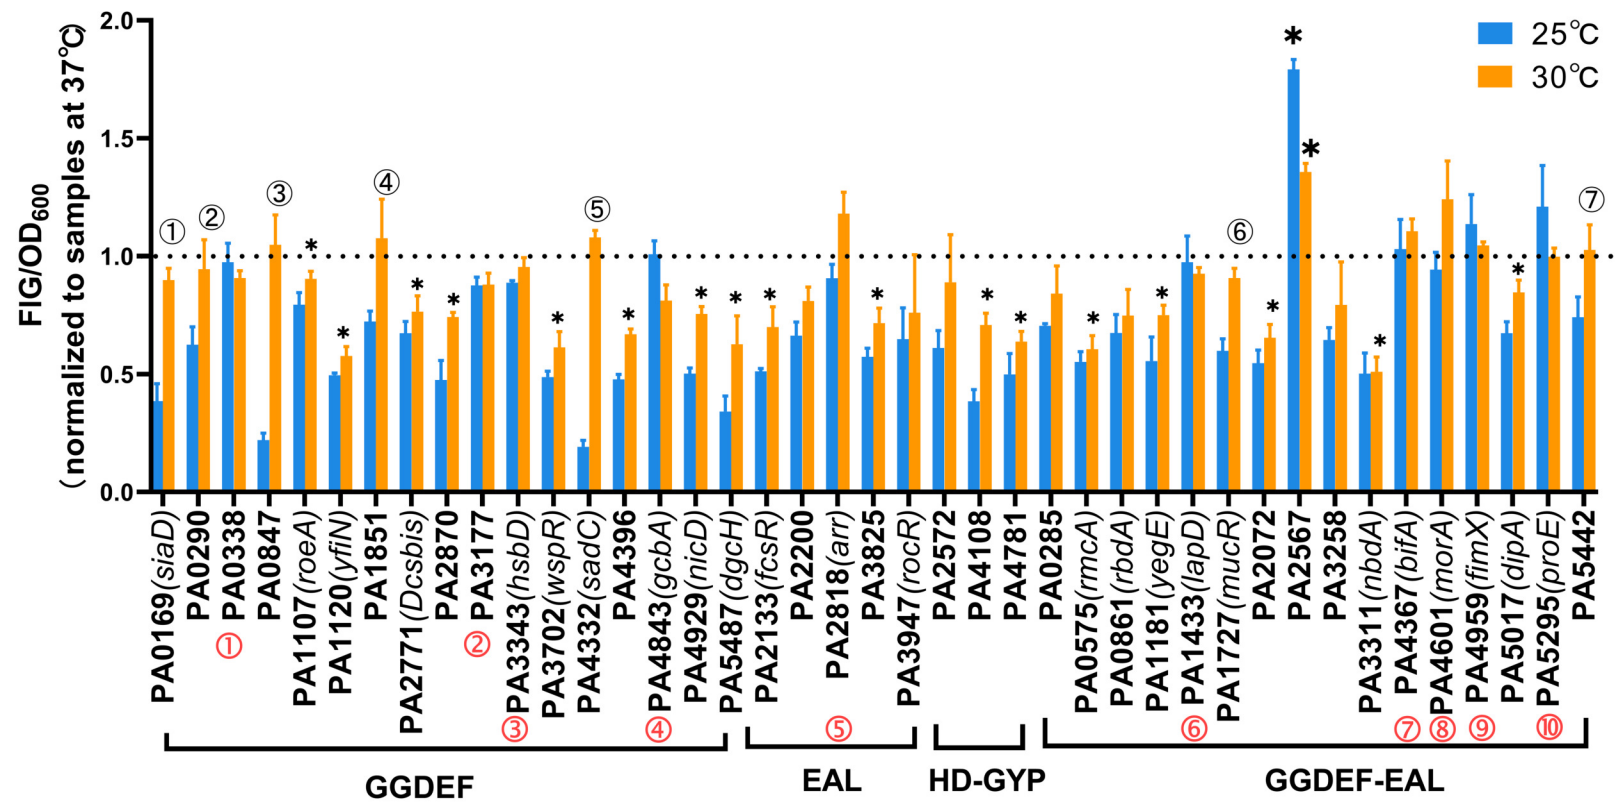



|           | M63                     | Jensen's   | LB        | ASM        |            |     |
|-----------|-------------------------|------------|-----------|------------|------------|-----|
| GGDEF     | PA0169( <i>siaD</i> )   | 0.50±0.01* | 1.00      | 1.44±0.10* | 0.63±0.05* | 1.5 |
|           | PA0290                  | 0.50±0.09* | 1.00      | 0.93±0.08  | 0.48±0.07* |     |
|           | PA0338                  | 0.35±0.03* | 1.00      | 0.91±0.06  | 0.47±0.02* |     |
|           | PA0847                  | 0.31±0.05* | 1.00      | 0.69±0.08* | 0.63±0.02* |     |
|           | PA1107( <i>roeA</i> )   | 0.48±0.09* | 1.00      | 0.67±0.06* | 0.72±0.05* |     |
|           | PA1120( <i>yfiN</i> )   | 0.28±0.03* | 1.00      | 0.51±0.04* | 0.79±0.05* |     |
|           | PA1851                  | 0.52±0.07* | 1.00      | 0.92±0.07  | 0.68±0.06* |     |
|           | PA2771( <i>Dcsbis</i> ) | 0.26±0.08* | 1.00      | 0.73±0.15  | 0.42±0.04* |     |
|           | PA2870                  | 0.56±0.05* | 1.00      | 0.88±0.13  | 0.93±0.06  |     |
|           | PA3177                  | 0.57±0.10* | 1.00      | 0.80±0.24  | 0.55±0.07* |     |
|           | PA3343( <i>hsbD</i> )   | 0.83±0.06* | 1.00      | 1.05±0.18  | 1.08±0.04  |     |
|           | PA3702( <i>wspR</i> )   | 0.52±0.03* | 1.00      | 1.20±0.26  | 0.74±0.06* |     |
|           | PA4332( <i>sadC</i> )   | 0.72±0.10* | 1.00      | 0.56±0.04* | 0.94±0.06  |     |
|           | PA4396                  | 0.94±0.07  | 1.00      | 1.05±0.09  | 1.79±0.13* |     |
|           | PA4843( <i>gcbA</i> )   | 0.56±0.07* | 1.00      | 0.77±0.02* | 0.75±0.12* |     |
|           | PA4929( <i>nicD</i> )   | 0.30±0.01* | 1.00      | 0.70±0.06* | 0.63±0.09* |     |
|           | PA5487( <i>dgCH</i> )   | 0.53±0.07* | 1.00      | 0.88±0.10  | 1.02±0.11  |     |
| EAL       | PA2133( <i>fcsR</i> )   | 0.36±0.03* | 1.00      | 0.80±0.04* | 0.67±0.02* | 1.0 |
|           | PA2200                  | 0.49±0.03* | 1.00      | 0.52±0.02* | 0.90±0.05  |     |
|           | PA2818( <i>arr</i> )    | 0.89±0.08  | 1.00      | 0.93±0.12  | 1.46±0.02* |     |
|           | PA3825                  | 0.45±0.06* | 1.00      | 0.83±0.16  | 0.59±0.07* |     |
|           | PA3947( <i>rocR</i> )   | 0.49±0.08* | 1.00      | 0.56±0.03* | 0.87±0.14  |     |
| HD-GYP    | PA2572                  | 0.41±0.05* | 1.00      | 0.38±0.10* | 0.65±0.03* | 0.5 |
|           | PA4108                  | 0.34±0.06* | 1.00      | 0.54±0.06* | 0.76±0.05* |     |
|           | PA4781                  | 0.46±0.08* | 1.00      | 0.65±0.02* | 0.74±0.04* |     |
| GGDEF-EAL | PA0285                  | 0.78±0.06* | 1.00      | 0.63±0.01* | 1.11±0.04  | 0.5 |
|           | PA0575( <i>rmcA</i> )   | 0.35±0.05* | 1.00      | 0.58±0.16* | 0.66±0.03* |     |
|           | PA0861( <i>rbdA</i> )   | 0.30±0.03* | 1.00      | 0.85±0.41  | 0.61±0.06* |     |
|           | PA1181( <i>yegE</i> )   | 0.61±0.08* | 1.00      | 1.22±0.20  | 0.86±0.03* |     |
|           | PA1433( <i>lapD</i> )   | 0.59±0.03* | 1.00      | 0.74±0.24* | 0.66±0.08* |     |
|           | PA1727( <i>mucR</i> )   | 0.62±0.01* | 1.00      | 0.71±0.07* | 1.14±0.08  |     |
|           | PA2072                  | 0.34±0.07* | 1.00      | 0.86±0.12  | 0.48±0.04* |     |
|           | PA2567                  | 0.51±0.04* | 1.00      | 0.49±0.03* | 0.66±0.06* |     |
|           | PA3258                  | 0.43±0.05* | 1.00      | 0.75±0.07* | 1.13±0.04  |     |
|           | PA3311( <i>nbdA</i> )   | 0.42±0.09* | 1.00      | 0.62±0.21* | 0.58±0.03* |     |
|           | PA4367( <i>bifA</i> )   | 0.37±0.04* | 1.00      | 0.29±0.01* | 0.71±0.02* |     |
|           | PA4601( <i>morA</i> )   | 0.41±0.03* | 1.00      | 0.55±0.02* | 0.82±0.01* |     |
|           | PA4959( <i>fimX</i> )   | 0.64±0.08* | 1.00      | 0.64±0.10* | 1.09±0.13  |     |
|           | PA5017( <i>dipA</i> )   | 0.64±0.06* | 1.00      | 0.72±0.07* | 0.87±0.02* |     |
|           | PA5295( <i>proE</i> )   | 0.53±0.01* | 1.00      | 0.55±0.02* | 1.13±0.10  |     |
| PA5442    | 0.62±0.03*              | 1.00       | 1.00±0.07 | 1.08±0.02  |            |     |

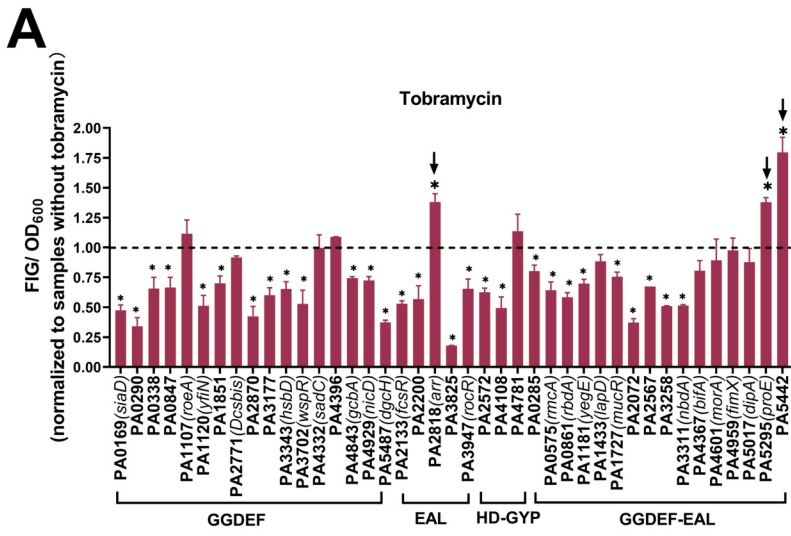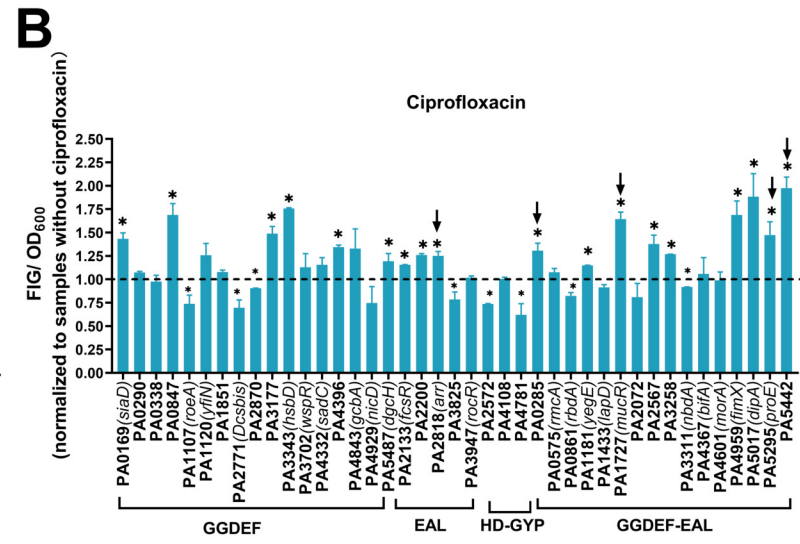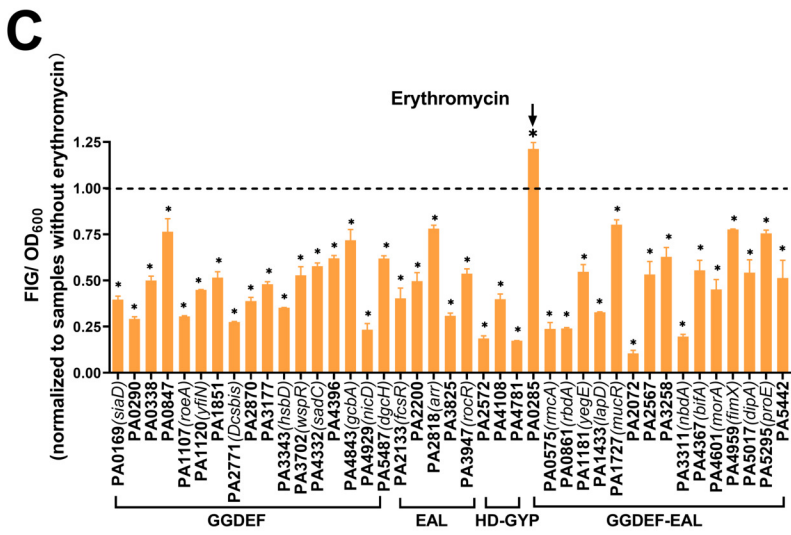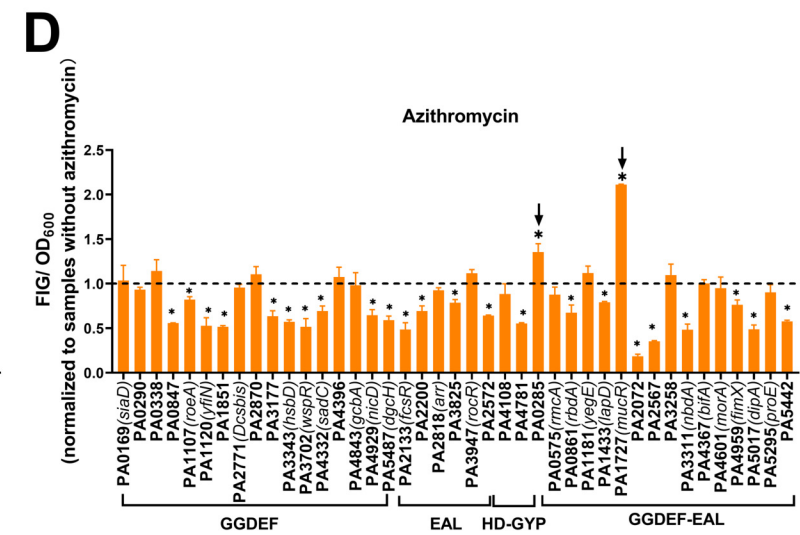

Source: http://biorxiv.org/content/10.1101/2022.06.15.496363v1.full.pdf
